# Supplementary material for: Characterization of a New and Efficient Polyvalent Phage Infecting E. coli O157:H7, Salmonella spp., and Shigella sonnei
Source: MDPI journal article supplement (doi:10.3390/microorganisms9102105), 2021-10-06
Supplement: s1 [file s1]

### Supplementary method S1

#### Adsorption assay of KFS-EC3

Adsorption assay of KFS-EC3 was performed as previously described by Kim et al. (2018) with minor modification [1]. Briefly, KFS-EC3 was mixed with a culture of *E. coli* O157:H7 ATCC 10536 ( $10^8$  CFU/mL) at an equivalent volume ratio to obtain a multiplicity of infection (MOI) of 0.001 and incubated at 37 °C for 8 min at 110 rpm. A 1 mL aliquot of the mixture was collected at every 2-min interval and centrifuged at  $12,000 \times g$  for 30 s at 4 °C. The supernatant containing the non-adsorbed phage was immediately filtered using a 0.20- $\mu$ m cellulose acetate filter and the filtrate that was obtained was used for phage titer determination using a plaque assay as described in section 2.2. The experiment was conducted in triplicates and the adsorption rate was calculated using the following equation:

Adsorption rate (%) = (average phage titer at each time interval) / (average phage titer at time 0)  $\times$  100

### Supplementary method S2

#### Polyvalent lytic capacity of KFS-EC3 against various host strains

For comparing the polyvalent lytic capacity of KFS-EC3 phage against each target bacterium and bacterial cocktail, KFS-EC3 ( $10^7$  PFU/mL) was added to each bacterial suspension of *E. coli* O157:H7 ATCC 10536, *Salmonella* Mission, and *Shigella sonnei* ATCC 9290 and the cocktail (1:1:1, v/v) at an MOI of 1.0. SM buffer was added in the control instead of using the phage. Following incubation at 37 °C with gentle shaking for 4 h, the bacterial number was counted using xylose lysine deoxycholate (XLD, Difco Laboratories Inc.) and eosin methylene blue (EMB, Difco Laboratories Inc.) agar plates for comparison.

#### [Supplementary data]

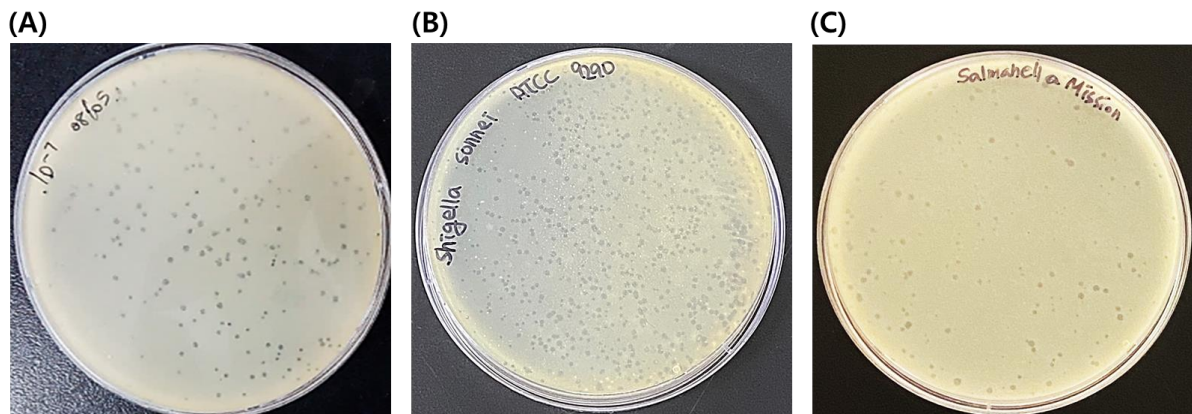

**Figure S1.** Plaque morphology of KFS-EC3 against (A) the indicator strain, (B) *Shigella sonnei*, and (C) *Salmonella* Mission.

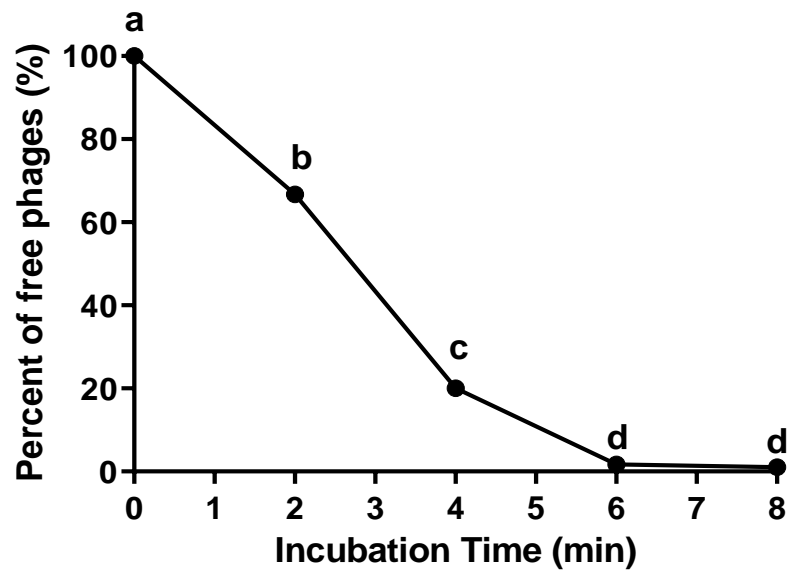

Figure S2. Adsorption assay of KFS-EC3.

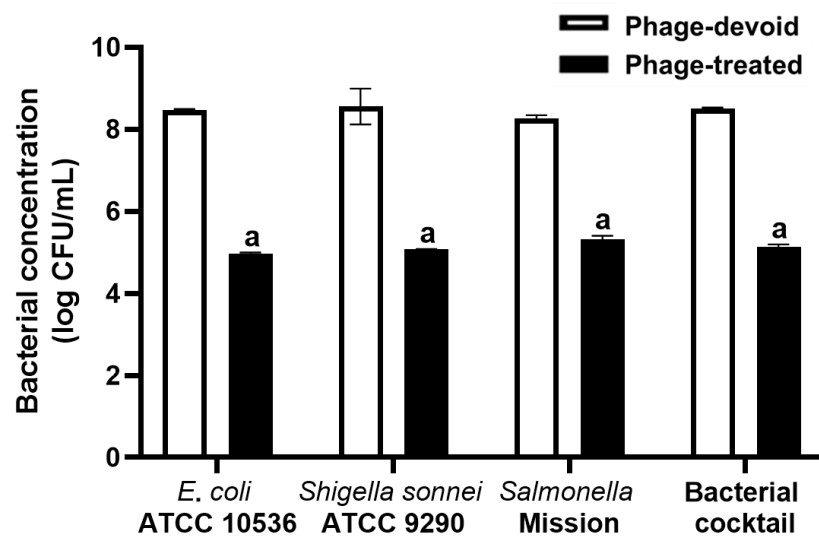

Figure S3. Polyvalent lytic capacity of KFS-EC3 after its exposure to each bacterium and their cocktail at an MOI of 1.0.

**Table S1.** Several reported broad and narrow spectrum phages infecting *E. coli*

| Phage           | Host strain                               | Classification      | Size of length (nm) |              | Specificity           | Eclipse period (min) | Latent period (min) | Burst size (PFU/cell) | Reference  |
|-----------------|-------------------------------------------|---------------------|---------------------|--------------|-----------------------|----------------------|---------------------|-----------------------|------------|
|                 |                                           |                     | Head                | Tail         |                       |                      |                     |                       |            |
| KFS-EC3         | <i>E. coli</i> O157:H7 ATCC 10536         | <i>Myoviridae</i>   | 96.35               | 68.42–133.48 | Polyvalent (3 genera) | 5                    | 20                  | 71                    | This study |
| SFP10           | <i>E. coli</i> O157:H7 ATCC 43890         | <i>Myoviridae</i>   | 68.75               | 41.67–131.25 | Polyvalent (2 genera) | 15                   | 25                  | 100                   | [2]        |
| HY01            | <i>E. coli</i> O157:H7 ATCC 43890         | <i>Myoviridae</i>   | 100                 | 100          | Polyvalent (2 genera) | 5                    | 25                  | 25                    | [3]        |
| PS5             | <i>S. Typhimurium</i> NBRC12529           | <i>Myoviridae</i>   | 84                  | 106          | Polyvalent (2 genera) | -                    | 25                  | 204                   | [4]        |
| PEf1            | <i>E. coli</i> K-12                       | <i>Siphoviridae</i> | -                   | -            | Polyvalent (2 genera) | -                    | 50                  | 99                    | [5]        |
| phiC119         | <i>E. coli</i> O157 EC-48                 | <i>Siphoviridae</i> | 43                  | 168          | Polyvalent (2 genera) | -                    | 20                  | 210                   | [6]        |
| SH6             | <i>Shigella flexneri</i> SF1              | <i>Siphoviridae</i> | 62 ± 2              | 161 ± 2      | Polyvalent (2 genera) | -                    | 16                  | 103 ± 16              | [7]        |
| vB_EcoM_swi3    | <i>E. coli</i> K88                        | <i>Myoviridae</i>   | 80                  | 120          | Polyvalent (2 genera) | -                    | 25                  | 25                    | [8]        |
| EcS1            | <i>E. coli</i> BL21                       | <i>Myoviridae</i>   | 111 ± 5.5           | 110 ± 5.5    | Polyvalent (3 genera) | -                    | -                   | -                     | [9]        |
| SH7             | <i>S. flexneri</i> SF1                    | <i>Myoviridae</i>   | 112 ± 5             | 116 ± 4      | Polyvalent (3 genera) | -                    | 23                  | 26 ± 5                | [7]        |
| T4 Yer mutants  | <i>E. coli</i> K-12                       | <i>Myoviridae</i>   | -                   | -            | Polyvalent (3 genera) | -                    | -                   | -                     | [10]       |
| KFS-EC          | <i>E. coli</i> O157:H7 ATCC 43895         | <i>Myoviridae</i>   | 100                 | 113          | Narrow                | 5                    | 30                  | 150                   | [11]       |
| CBA120          | <i>E. coli</i> O157:H7 NCTC 12900         | <i>Myoviridae</i>   | 90                  | 105          | Narrow                | 20                   | 40                  | 440                   | [12]       |
| CEV1            | <i>E. coli</i> O157:H7 NCTC 12900         | <i>Myoviridae</i>   | 100                 | 100          | Narrow                | 18                   | 26                  | 150                   | [13]       |
| FAHEc1          | <i>E. coli</i> O157:H7 isolate ERL 022447 | <i>Myoviridae</i>   | 99                  | 108          | Narrow                | -                    | -                   | -                     | [14]       |
| rV5             | <i>E. coli</i> O157:H7 strain R508        | <i>Myoviridae</i>   | 91                  | 121          | Narrow                | -                    | -                   | -                     | [15]       |
| vB_EcoS_ACG-C40 | <i>E. coli</i> isolate Can 40             | <i>Myoviridae</i>   | 110                 | 114          | Narrow                | -                    | -                   | -                     | [16]       |
| vB_EcoS_ACG-C91 | <i>E. coli</i> isolate Can 91             | <i>Podoviridae</i>  | 65–68               | 12           | Narrow                | -                    | -                   | -                     | [16]       |
| vB_EcoS_ACG-M12 | <i>E. coli</i> isolate MSHS1210           | <i>Siphoviridae</i> | 57                  | 172          | Narrow                | -                    | -                   | -                     | [16]       |
| Φ241            | <i>E. coli</i> O157:H7 strain B0241       | <i>Myoviridae</i>   | 80                  | 33           | Narrow                | -                    | 15                  | 53                    | [17]       |
| vB-EcoS_Rogue1  | <i>E. coli</i> O157:H7 R508N              | <i>Siphoviridae</i> | 53                  | 152          | Narrow                | -                    | -                   | -                     | [18]       |
| vB_EcoS_HSE2    | <i>E. coli</i> strain 40371               | <i>Siphoviridae</i> | 56                  | 178          | Narrow                | -                    | 30                  | 86                    | [19]       |
| Vb_EcoS_B2      | <i>E. coli</i> BL21                       | <i>Siphoviridae</i> | 48                  | 143          | Narrow                | -                    | 30                  | 224                   | [20]       |
| vB_EcoM_IME339  | <i>E. coli</i> BL21                       | <i>Myoviridae</i>   | -                   | -            | -                     | -                    | -                   | 91                    | [21]       |
| Teqskov         | <i>E. coli</i> K-12 MG1655                | <i>Myoviridae</i>   | -                   | -            | -                     | -                    | -                   | -                     | [22]       |
| Teqhal          | <i>E. coli</i> K-12 MG1655                | <i>Myoviridae</i>   | -                   | -            | -                     | -                    | -                   | -                     | [22]       |
| Slur08          | <i>E. coli</i> K-12 MG1655                | <i>Myoviridae</i>   | -                   | -            | -                     | -                    | -                   | -                     | [23]       |
| Slur03          | <i>E. coli</i> K-12 MG1655                | <i>Myoviridae</i>   | -                   | -            | -                     | -                    | -                   | -                     | [23]       |
| phiLLS          | <i>E. coli</i> O157:H7 CECT 4076          | <i>Siphoviridae</i> | 56                  | 135          | -                     | -                    | 70                  | 176                   | [24]       |

**Table S2.** General genomic characteristics of KFS-EC3 and phylogenetically related phages

| Phage            | Host                              | Genome (bp) | GC content (%) | Taxonomy (Family; Genus)                    | Identity (%) | Accession number |
|------------------|-----------------------------------|-------------|----------------|---------------------------------------------|--------------|------------------|
| KFS-EC3          | <i>E. coli</i> O157:H7 ATCC 10536 | 166,440     | 35.5           | <i>Myoviridae</i> ;<br><i>Tequatrovirus</i> | -            | MZ065353         |
| Slur13           | <i>E. coli</i> K-12 MG1655        | 167,299     | 35.5           | <i>Myoviridae</i> ;<br><i>Tequatrovirus</i> | 96.24        | LN881737.1       |
| Slur04           | <i>E. coli</i> K-12 MG1655        | 167,298     | 35.5           | <i>Myoviridae</i> ;<br><i>Tequatrovirus</i> | 96.24        | NC042130.1       |
| Slur11           | <i>E. coli</i> K-12 MG1655        | 167,298     | 35.5           | <i>Myoviridae</i> ;<br><i>Tequatrovirus</i> | 96.24        | LN881734.1       |
| Teqhal           | <i>E. coli</i> MG1655 K-12        | 168,070     | 35.1           | <i>Myoviridae</i> ;<br><i>Tequatrovirus</i> | 96.28        | MN895435.1       |
| Teqsoen          | <i>E. coli</i> K-12 MG1655        | 166,468     | 35.5           | <i>Myoviridae</i> ;<br><i>Tequatrovirus</i> | 96.00        | MN895436.1       |
| Kha5h            | <i>E. coli</i> O103:H2            | 167,318     | 35.5           | <i>Myoviridae</i> ;<br><i>Tequatrovirus</i> | 96.35        | KT184312.1       |
| Shfl2            | <i>Shigella flexneri</i>          | 165,919     | 35.6           | <i>Myoviridae</i> ;<br><i>Tequatrovirus</i> | 97.47        | HM035025.1       |
| ime09            | <i>E. coli</i>                    | 166,499     | 35.7           | <i>Myoviridae</i> ;<br><i>Tequatrovirus</i> | 98.04        | JN202312.1       |
| vB_EcoM_IME339   | <i>E. coli</i> BL21               | 164,366     | 35.6           | <i>Myoviridae</i> ;<br><i>Tequatrovirus</i> | 97.71        | MH051915.1       |
| vB_EcoM_G50      | <i>E. coli</i>                    | 167,728     | 35.5           | <i>Myoviridae</i> ;<br><i>Tequatrovirus</i> | 97.74        | MK327942.1       |
| vB_EcoM_KAW1E185 | <i>E. coli</i>                    | 164,987     | 35.4           | <i>Myoviridae</i> ;<br><i>Tequatrovirus</i> | 96.56        | MK373781.1       |
| Teqskov          | <i>E. coli</i> MG1655 K-12        | 165,017     | 35.4           | <i>Myoviridae</i> ;<br><i>Tequatrovirus</i> | 96.69        | MN895437.1       |
| phiD1            | <i>Yersinia pestis</i>            | 167,063     | 35.5           | <i>Myoviridae</i> ;<br><i>Tequatrovirus</i> | 96.81        | HE956711.1       |
| vB_EcoM_Ozark    | <i>E. coli</i> (STEC)             | 167,600     | 39.5           | <i>Myoviridae</i> ;<br><i>Tequatrovirus</i> | 96.49        | MT682713.1       |
| Slur08           | <i>E. coli</i> K-12 MG1655        | 167,467     | 35.4           | <i>Myoviridae</i> ;<br><i>Tequatrovirus</i> | 96.12        | LN881733.1       |
| Slur14           | <i>E. coli</i> K-12 MG1655        | 167,467     | 35.4           | <i>Myoviridae</i> ;<br><i>Tequatrovirus</i> | 96.13        | LN881736.1       |
| Slur03           | <i>E. coli</i> K-12 MG1655        | 167,467     | 35.4           | <i>Myoviridae</i> ;<br><i>Tequatrovirus</i> | 96.12        | NC042129.1       |
| PhiZZ30          | <i>Serratia</i> sp. ATCC 39006    | 167,484     | 35.3           | <i>Myoviridae</i> ;<br><i>Tequatrovirus</i> | 96.25        | MT176426.1       |
| vB_EcoM_Lutter   | <i>E. coli</i> (STEC)             | 170,054     | 35.4           | <i>Myoviridae</i> ;<br><i>Tequatrovirus</i> | 96.39        | MT682714.1       |
| T4               | <i>E. coli</i> B strain           | 168,908     | 35.3           | <i>Myoviridae</i> ;<br><i>Tequatrovirus</i> | 96.23        | MT984581.1       |

## References

- Kim, S.; Kim, S. H.; Rahman, M.; Kim, J. Characterization of a *Salmonella* Enteritidis bacteriophage showing broad lytic activity against Gram-negative enteric bacteria. *J. Microbiol.* **2018**, *56*, 917–925.
- Park, M.; Lee, J. H.; Shin, H.; Kim, M.; Choi, J.; Kang, D. H.; Ryu, S. Characterization and comparative genomic analysis of a novel bacteriophage, SFP10, simultaneously inhibiting both *Salmonella* enterica and *Escherichia coli* O157: H7. *Appl. Environ. Microbiol.* **2012**, *78*, 58–69.
- Lee, H.; Ku, H. J.; Lee, D. H.; Kim, Y. T.; Shin, H.; Ryu, S.; Lee, J. H. Characterization and genomic study of the novel bacteriophage HY01 infecting both *Escherichia coli* O157: H7 and *Shigella flexneri*: potential as a biocontrol agent in food. *PLoS One* **2016**, *11*, e0168985.
- Duc, H. M.; Son, H. M.; Yi, H. P. S.; Sato, J.; Ngan, P. H.; Masuda, Y.; Miyamoto, T. Isolation, characterization and application of a polyvalent phage capable of controlling *Salmonella* and *Escherichia coli* O157: H7 in different food matrices. *Food Res. Int.* **2020**, *131*, 108977.
- Yu, P.; Mathieu, J.; Li, M.; Dai, Z.; Alvarez, P. J. Isolation of polyvalent bacteriophages by sequential multiple-host approaches. *Appl. Environ. Microbiol.* **2016**, *82*, 808–815.
- Amarillas, L.; Chaidez, C.; González-Robles, A.; Lugo-Melchor, Y.; León-Félix, J. Characterization of novel bacteriophage phiC119 capable of lysing multidrug-resistant Shiga toxin-producing *Escherichia coli* O157: H7. *PeerJ*, **2016**, *4*, e2423.
- Hamdi, S.; Rousseau, G. M.; Labrie, S. J.; Tremblay, D. M.; Kourda, R. S.; Slama, K. B.; Moineau, S. Characterization of two polyvalent phages infecting *Enterobacteriaceae*. *Sci. Rep.* **2017**, *7*, 1–12.
- Sui, B.; Han, L.; Ren, H.; Liu, W.; Zhang, C. A Novel Polyvalent Bacteriophage vB\_EcoM\_swi3 Infects Pathogenic *Escherichia coli* and *Salmonella enteritidis*. *Front. Microbiol.* **2021**, 1496.
- Saad, A. M.; Askora, A.; Kawasaki, T.; Fujie, M.; Yamada, T. Full genome sequence of a polyvalent bacteriophage infecting strains of *Shigella*, *Salmonella*, and *Escherichia*. *Arch. Virol.* **2018**, *163*, 3207–3210.
- Tétart, F.; Repoila, F.; Monod, C.; Krisch, H. M. Bacteriophage T4 host range is expanded by duplications of a small domain of the tail fiber adhesin. *J. Mol. Biol.* **1996**, *258*, 726–731.
- Lee, C.; Choi, I. Y.; Park, D. H.; Park, M. K. Isolation and characterization of a novel *Escherichia coli* O157: H7-specific phage as a biocontrol agent. *J. Environ. Health Sci. Eng.* **2020**, 1–11.
- Kutter, E. M.; Skutt-Kakaria, K.; Blasdel, B.; El-Shibiny, A.; Castano, A.; Bryan, D.; Brabban, A. D. Characterization of a Vil-like phage specific to *Escherichia coli* O157: H7. *Virol. J.* **2020**, *8*, 1–14.
- Raya, R. R.; Varey, P.; Oot, R. A.; Dyen, M. R.; Callaway, T. R.; Edrington, T. S.; Kutter E. M.; Brabban, A. D. Isolation and characterization of a new T-even bacteriophage, CEV1, and determination of its potential to reduce *Escherichia coli* O157: H7 levels in sheep. *Appl. Environ. Microbiol.* **2006**, *72*, 6405–6410.
- Hudson, J. A.; Billington, C.; Cornelius, A. J.; Wilson, T.; On, S. L. W.; Premaratne, A.; King, N. J. Use of a bacteriophage to inactivate *Escherichia coli* O157: H7 on beef. *Food Microbiol.* **2013**, *36*, 14–21.
- Kropinski, A. M.; Waddell, T.; Meng, J.; Franklin, K.; Ackermann, H. W.; Ahmed, R.; Mazzocco, A.; Yates, J.; Lingohr E. J.; Johnson, R. P. The host-range, genomics and proteomics of *Escherichia coli* O157: H7 bacteriophage rV5. *Virol. J.* **2013**, *10*, 1–12.
- Chibeu, A.; Lingohr, E. J.; Masson, L.; Manges, A.; Harel, J.; Ackermann, H. W.; Kropinski, A. M.; Boerlin, P. Bacteriophages with the ability to degrade uropathogenic *Escherichia coli* biofilms. *Viruses* **2012**, *4*, 471–487.
- Lu, Z.; Breidt, F. *Escherichia coli* O157: H7 bacteriophage Φ241 isolated from an industrial cucumber fermentation at high acidity and salinity. *Front. Microbiol.* **2015**, *6*, 67.
- Kropinski, A. M.; Lingohr, E. J.; Moyles, D. M.; Ojha, S.; Mazzocco, A.; She, Y. M.; Bach, S. J.; Rozema, E. A.; Stanford, K.; McAllister, T. A.; Johnson, R. P. Endemic bacteriophages: a cautionary tale for evaluation of bacteriophage therapy and other interventions for infection control in animals. *Virol. J.* **2012**, *9*, 1–9.
- Peng, Q.; Yuan, Y. Characterization of a newly isolated phage infecting pathogenic *Escherichia coli* and analysis of its mosaic structural genes. *Sci. Rep.* **2018**, *8*, 1–10.
- Xu, Y.; Yu, X.; Gu, Y.; Huang, X.; Liu, G.; Liu, X. Characterization and genomic study of phage vB\_EcoS-B2 infecting multidrug-resistant *Escherichia coli*. *Front. Microbiol.* **2018**, *9*, 793.
- Li, P.; Lin, H.; Mi, Z.; Xing, S.; Tong, Y.; Wang, J. Screening of polyvalent phage-resistant *Escherichia coli* strains based on phage receptor analysis. *Front. Microbiol.* **2019**, *10*, 850.
- Olsen, N. S.; Forero-Junco, L.; Kot, W.; Hansen, L. H. Exploring the remarkable diversity of culturable *Escherichia coli* phages in the Danish Wastewater Environment. *Viruses* **2020**, *12*, 986.
- Smith, R.; O'Hara, M.; Hobman, J. L.; Millard, A. D. Draft genome sequences of 14 *Escherichia coli* phages isolated from cattle slurry. *Genome Announc.* **2015**, *3*, e01364–15.
- Amarillas, L.; Rubí-Rangel, L.; Chaidez, C.; González-Robles, A.; Lightbourn-Rojas, L.; León-Félix, J. Isolation and characterization of phiLLS, a novel phage with potential biocontrol agent against multidrug-resistant *Escherichia coli*. *Front. Microbiol.* **2017**, *8*, 1355.
